# Supplementary material
Source: publisher site journal article supplement (https://www.dovepress.com/get_supplementary_file.php?f=489819.xlsx)
Supplement: Supplementary file 1 [file get_supplementary_file.php]

## Sheet: Appendix S1
Search terms and search expressions for Chinese and English databases
Database	Search terms	Search formula
Searching databases in English
Take PubMed for example	diabetes mellitus, type 2/diabetes mellitus type Ⅱ/type 2 diabetes/type 2 diabetes mellitus/T2DM/cognitive dysfunction/memory disorders/cognition disorders/cognitive impairment/cognitive deficit/cognitive defect/cognitive decline/risk assessment/risk prediction/prediction model/prediction tool/prognostic model/risk score/risk calculation/nomograms/partin table*/partin nomogram*	#1 "diabetes mellitus, type 2"[MeSH Terms] OR "diabetes mellitus type ii"[Title/Abstract] OR "type 2 diabetes"[Title/Abstract] OR "type 2 diabetes mellitus"[Title/Abstract] OR "T2DM"[Title/Abstract] #2 "cognitive dysfunction"[MeSH Terms] OR "memory disorders"[MeSH Terms] OR "cognition disorders"[MeSH Terms] OR "cognitive impairment"[Title/Abstract] OR "cognitive deficit"[Title/Abstract] OR "cogni…
Searching databases in Chinese
Take CNKI for example	Type 2 diabetes/cognitive impairment/cognitive deficits/cognitive deficits/cognitive changes/cognitive alterations/cognitive damage/cognitive decline	( TKA=Type 2 diabetes) AND ( TKA=cognitive impairment + cognitive deficits + cognitive deficits + cognitive changes + cognitive alterations + cognitive damage + cognitive decline) AND ( TKA=Risk prediction + predictive model + prediction tools + risk scoring + risk assessment + nomogram + machine learning)

## Sheet: Appendix S2
The Agency for Healthcare Research and Quality (AHRQ)
Item	Zhang(2023)	Maimaitituerxun(2023)	Zhang(2023)	Wang(2024)	Jiang(2024)	Zhao(2024)	Kang(2024)	Ding(2024)	Zhang(2024)	Liu(2024)	Yu(2024)	Yang(2024)
1) Define the source of information (survey, record review)	Yes	Yes	Yes	Yes	Yes	Yes	Yes	Yes	Yes	Yes	Yes	Yes
2) List inclusion and exclusion criteria for exposed and unexposed subjects (cases and controls) or refer to previous publications	Yes	Yes	Yes	Yes	Yes	Yes	Yes	Yes	Yes	Yes	Yes	Yes
3) Indicate time period used for identifying patients	Yes	Yes	Yes	Yes	Yes	Yes	Yes	Yes	Yes	Yes	Yes	Yes
4) Indicate whether or not subjects were consecutive if not population-based	Yes	Yes	Yes	Yes	Yes	Yes	Yes	Yes	Yes	Yes	Yes	Yes
5) Indicate if evaluators of subjective components of study were masked to other aspects of the status of the participants	Unclear	Yes	Unclear	Unclear	Unclear	Unclear	Unclear	Unclear	Unclear	Unclear	Unclear	Unclear
6) Describe any assessments undertaken for quality assurance purposes (e.g., test/retest of primary outcome measurements)	Unclear	Unclear	Unclear	Unclear	Unclear	Unclear	Yes	Yes	Unclear	Unclear	Unclear	Unclear
7) Explain any patient exclusions from analysis	Unclear	Yes	Unclear	Yes	Unclear	Unclear	Yes	Yes	Yes	Unclear	Unclear	Unclear
8) Describe how confounding was assessed and/or controlled.	Unclear	Yes	Unclear	Yes	Yes	Yes	Yes	Yes	Unclear	Unclear	Unclear	Unclear
9) If applicable, explain how missing data were handled in the analysis	Unclear	Yes	Unclear	Yes	Unclear	Unclear	Yes	Yes	Yes	Unclear	Unclear	Unclear
10) Summarize patient response rates and completeness of data collection	Unclear	Yes	Unclear	Yes	Unclear	Unclear	Unclear	Unclear	Unclear	Yes	Yes	Yes
11) Clarify what follow-up, if any, was expected and the percentage of patients for which incomplete data or follow-up was obtained	Unclear	Unclear	Unclear	Unclear	Unclear	Unclear	Unclear	Unclear	Unclear	Unclear	Unclear	Unclear
Total score	4	9	4	8	5	5	8	8	6	5	5	5

## Sheet: Appendix S3
Prediction Model Risk of Bias Assessment Tool (PROBAST)
Part I: Risk of bias evaluation	Zhang(2023)	Maimaitituerxun(2023)	Zhang(2023)	Wang(2024)	Jiang(2024)	Zhao(2024)	Kang(2024)	Ding(2024)	Zhang(2024)	Liu(2024)	Yu(2024)	Yang(2024)
Study Subjects	low	low	low	low	low	low	low	low	low	low	low	low
1. Is the source of the data appropriate?	Yes	Yes	Yes	Yes	Yes	Yes	Yes	Yes	Yes	Yes	Yes	Yes
2. Were the inclusion and exclusion criteria for the study population appropriate?	Yes	Yes	Yes	Yes	Yes	Yes	Yes	Yes	Yes	Yes	Yes	Yes
Predictors	low	low	low	low	low	low	low	low	low	low	low	low
1. Are the definition and assessment of predictors the same for all study populations?	Yes	Yes	Yes	Yes	Yes	Yes	Yes	Yes	Yes	Yes	Yes	Yes
2. Are predictors assessed without knowledge of the outcome data?	Yes	Yes	Yes	Yes	Yes	Yes	Yes	Yes	Yes	Yes	Yes	Yes
3. Are the predictors included in the prediction model valid?	Yes	Yes	Yes	Yes	Yes	Yes	Yes	Yes	Yes	Yes	Yes	Yes
Results	Unclear	low	Unclear	Unclear	Unclear	Unclear	Unclear	Unclear	Unclear	Unclear	low	low
1. Is the method of categorization of results reasonable?	Yes	Yes	Yes	Yes	Yes	Yes	Yes	Yes	Yes	Yes	Yes	Yes
2. Are the definitions of the results reasonable?	Yes	Yes	Yes	Yes	Yes	Yes	Yes	Yes	Yes	Yes	Yes	Yes
3. Does the definition of the outcome exclude predictors?	Yes	Yes	Yes	Yes	Yes	Yes	Yes	Yes	Yes	Yes	Yes	Yes
4. Is the definition of the outcome the same for all study participants?	Yes	Yes	Yes	Yes	Yes	Yes	Yes	Yes	Yes	Yes	Yes	Yes
5. Was the information on the predictors unclear at the time the results were determined?	Unclear	Yes	Unclear	Unclear	Unclear	Unclear	Unclear	Unclear	Unclear	Unclear	Yes	Yes
6. Was the time interval between the assessment of the predictors and the determination of the results reasonable?	Yes	Yes	Yes	Yes	Yes	Yes	Yes	Yes	Yes	Yes	Yes	Yes
Statistical analysis	high	high	high	high	high	high	high	high	high	high	high	high
1. Is the sample size reasonable?	No	No	No	No	No	No	No	No	No	No	No	No
2. Is the treatment of continuous and categorical independent variables appropriate?	Yes	No	Yes	No	No	No	Yes	Yes	Yes	Yes	No	No
3. Are all included subjects included in the statistical analysis?	Yes	Yes	Yes	Yes	Yes	Yes	Yes	Yes	Yes	Yes	Yes	Yes
4. Were inclusion subjects with missing data treated appropriately?	Yes	Yes	Yes	Yes	Yes	Yes	No	No	Yes	Yes	Yes	Yes
★5. Was screening of predictors using one-way analysis of variance avoided?	Yes	No	No	No	No	No	No	No	No	No	Yes	Yes
6. Is the complexity of the data taken into account?	Yes	Unclear	Unclear	Unclear	Unclear	Unclear	Unclear	Unclear	Unclear	Unclear	Unclear	Unclear
7. Is the performance of the predictive model evaluated?	No	Yes	Yes	No	Yes	No	Yes	Yes	No	No	Yes	No
★8. Are overfitting, underfitting, and optimal fitting of predictive models considered?	No	Yes	Yes	No	Yes	No	Yes	Yes	Yes	No	Yes	Yes
★9. Are the predictors and their weights consistent with the reported results?	Yes	Unclear	Unclear	Unclear	Unclear	Yes	Unclear	Yes	Unclear	Yes	Yes	Yes
Overall risk of bias evaluation:	high	high	high	high	high	high	high	high	high	high	high	high
Part II: Evaluation of applicability
1. Study subjects Low applicability risk: the original study population and clinical design are consistent with the systematic evaluation questions. High applicability risk: the original study population and clinical design are different from the systematic evaluation research questions. Unclear: Information on the study population and clinical design is not reported.	low	low	low	low	low	low	low	low	low	low	low	low
2. Predictors Low applicability risk: the definition, assessment and timing of the original study predictors are consistent with the systematic evaluation questions. High applicability risk: the definition, assessment, and timing of assessment of the original study predictors differ from the systematic evaluation questions. Unclear: Information on predictors is not reported.	low	low	low	low	low	low	low	low	low	low	low	low
3. Results Low applicability risk: definition, assessment, and timing of assessment of the original study predictors are consistent with the systematic evaluation questions. High applicability risk: the definition, assessment and timing of assessment of the original study predictors differed from the systematic evaluation questions. Unclear: Information on predictors was not reported.	low	low	low	low	low	low	low	low	low	low	low	low
Overall applicability evaluation:	low	low	low	low	low	low	low	low	low	low	low	low
